# Supplementary material for: Quinoa Abiotic Stress Responses: A Review
Source: Plants (Basel). 2018 Nov 29;7(4):106. doi: 10.3390/plants7040106 (PMC6313892; doi:10.3390/plants7040106)
Supplement: Supplementary file 1 [file plants-07-00106-s001.pdf]

**Table S1.** Candidate genes involved in the salinity tolerance in quinoa

| Genes                                                | Varieties evaluated and annotations                                                                           | Salt concentration | Reference |
|------------------------------------------------------|---------------------------------------------------------------------------------------------------------------|--------------------|-----------|
| Salt Overly Sensitive 1 (CqSOS1a, CqSOS1b)           | Sal variety ‘Ollague’, up-regulated in leaves but not in roots                                                | 300 mM NaCl        | [173]     |
|                                                      | Sea-level varieties ‘PRJ’, ‘PRP’, ‘UDEC9’, and ‘B078’. In shoots strongly up-regulated than in roots          | 450 mM NaCl        | [133]     |
|                                                      | Valley variety ‘Cica’ and the salares varieties ‘Ollague’, and ‘Chipaya’; up-regulated in leaves              | 450 mM NaCl        | [174]     |
| Na <sup>+</sup> /H <sup>+</sup> exchanger 1 (CqNHX1) | Sea-level varieties ‘PRJ’, ‘PRP’, ‘UDEC9’, and ‘B078’; up-regulated in shoots and roots                       | 450 mM NaCl        | [133]     |
|                                                      | ‘Valley variety ‘Cica’ and the salares varieties ‘Ollague’, and ‘Chipaya’; up-regulation in leaves and shoots | 300 mM NaCl        | [174]     |
| Betaine aldehyde dehydrogenase (BADH)                | ‘Valley variety ‘Cica’ and the salares varieties ‘Ollague’, and ‘Chipaya’; up-regulated in leaves             | 450 mM NaCl        | [174]     |

|                                                                                                                                                                                                                                                                                                                                                                                                                                                                                                                                                                                                                                                                                                                                                                             |                                                                                                                         |                                       |              |
|-----------------------------------------------------------------------------------------------------------------------------------------------------------------------------------------------------------------------------------------------------------------------------------------------------------------------------------------------------------------------------------------------------------------------------------------------------------------------------------------------------------------------------------------------------------------------------------------------------------------------------------------------------------------------------------------------------------------------------------------------------------------------------|-------------------------------------------------------------------------------------------------------------------------|---------------------------------------|--------------|
| <p><b><i>ABA-related:</i></b><br/> 9-cis-epoxycarotenoid dioxygenase (NCED)<br/> ABA-binding factors (ABF3)<br/> Pyrabactin resistant (PYR, PYL)<br/> β-glucosidase homologues (BG1)<br/> Polyamine-related<br/> Arginine decarboxylase (ADC1, ADC2)<br/> Spermidine synthase (SPDS1)<br/> S-adenosylmethionine decarboxylase (SAMDC)<br/> Spermine synthase (SPMS)<br/> Diamine oxidase (DAO)<br/> Ion homeostasis-related<br/> CqSOS1a<br/> CqNHX<br/> K<sup>+</sup> transporter (HKT)</p> <p><b><i>Growth:</i></b><br/> Cyclin D3 (CycD3)<br/> B-Expansion (βEXP1)<br/> Stress-related genes<br/> Responsive to dessication 22 (RD22)<br/> Pyrroline-5-carboxylate (P5CS)<br/> Transcription factors<br/> Dehydration-responsive element-binding protein 2A (DREB2a)</p> | <p>Salar variety ‘R49’ and sea-level variety ‘Villarica’</p>                                                            | <p>300 mM NaCl<br/> 0 – 120 hours</p> | <p>[122]</p> |
|                                                                                                                                                                                                                                                                                                                                                                                                                                                                                                                                                                                                                                                                                                                                                                             | <p>Salar variety ‘R49’, early up-regulated of ion homeostasis genes and polyamine related genes</p>                     |                                       |              |
|                                                                                                                                                                                                                                                                                                                                                                                                                                                                                                                                                                                                                                                                                                                                                                             | <p>Sea-level variety ‘Villarica’ highly expression on NCED, RD22, and DREB2a</p>                                        |                                       |              |
| <p>Pyrabactin resistant (PYR, PYL)<br/> Serine/threonine kinases (SnRK2)</p>                                                                                                                                                                                                                                                                                                                                                                                                                                                                                                                                                                                                                                                                                                | <p>Inbred quinoa accession ‘Kd’. Two phylogenetically similar genes of PYR and two of SnRK2 were observed in quinoa</p> | <p>300 mM NaCl</p>                    | <p>[167]</p> |

|                                                                                                                                                                                                                                                                                                                                                                                                                                                                                                                                                                                                                                                                                                                                                                                        |                                                                                                                          |             |       |
|----------------------------------------------------------------------------------------------------------------------------------------------------------------------------------------------------------------------------------------------------------------------------------------------------------------------------------------------------------------------------------------------------------------------------------------------------------------------------------------------------------------------------------------------------------------------------------------------------------------------------------------------------------------------------------------------------------------------------------------------------------------------------------------|--------------------------------------------------------------------------------------------------------------------------|-------------|-------|
| <p><b><i>Copy number of main genes in salinity conditions:</i></b></p> <p>9-cis-epoxycarotenoid dioxygenase (NCED), 11 genes</p> <p>Neoxanthin synthase (NSY), 7 genes</p> <p>ABA4, 2 genes</p> <p>Short-chain dehydrogenases/reductases (SDRs), 37 genes</p> <p>Pyrabactin resistant (PYL) family, 22 genes</p> <p>Na<sup>+</sup>/H<sup>+</sup> exchanger, 11 genes</p> <p>ABC transports group (ABCGs), 81 genes</p> <p>Zeaxanthin epoxidase (ZEP), 2 genes</p> <p>Violaxanthin de-epoxidase (VDE), 2 genes</p> <p>Cell anion channels (SLAH), 6 genes</p> <p>Nitrate transporter (NRT), 12 genes</p> <p>Chloride channel protein (C1C), 10 genes</p> <p>Hemoglobin family (HB), 8 genes</p> <p>H<sup>+</sup> ATPase (AHA), 20 genes</p> <p>Glucose transporter (GLUT), 68 genes</p> | Salar variety 'Quinoa Real' (genome and mRNA sequencing)                                                                 | 100 mM NaCl | [151] |
|                                                                                                                                                                                                                                                                                                                                                                                                                                                                                                                                                                                                                                                                                                                                                                                        | Quinoa variety 5020 (mRNA sequencing in EBCs)                                                                            |             |       |
|                                                                                                                                                                                                                                                                                                                                                                                                                                                                                                                                                                                                                                                                                                                                                                                        | EBC is a photosynthetically inactive tissue and has a strong activity in ion transportation, cell wall and wax synthesis |             |       |

|                                                                                                                                                                                                                                                                                                                                                                                                                                                                                                                                                                                                                                                                                                                                                                                                                                                                        |                                                                                                                                             |                    |              |
|------------------------------------------------------------------------------------------------------------------------------------------------------------------------------------------------------------------------------------------------------------------------------------------------------------------------------------------------------------------------------------------------------------------------------------------------------------------------------------------------------------------------------------------------------------------------------------------------------------------------------------------------------------------------------------------------------------------------------------------------------------------------------------------------------------------------------------------------------------------------|---------------------------------------------------------------------------------------------------------------------------------------------|--------------------|--------------|
| <p><b><i>Transmembrane domains genes:</i></b></p> <p>WAKL8 Wall-associated receptor kinase-like 8 (AUR62006689) (AUR62029668)</p> <p>At1g21890 WAT1-related protein At1g21890 (AUR62039756)</p> <p>At1g67300 Probable plastidic glucose transporter 2 (AUR62021463)</p> <p>CYP75B1 Flavonoid 3'-monooxygenase (AUR62007451)</p> <p>psbD Photosystem II D2 protein (AUR62039871)</p> <p>CER1: Protein ECERIFERUM (AUR62043781) (AUR62043583)</p> <p>AAP6 Amino acid permease 6 (AUR62034957)</p> <p>SULTR1;1 Sulfate transporter 1.1 (AUR62011984)</p> <p>SULTR3;4 Probable sulfate transporter 3.4 (AUR62021522)</p> <p>SULTR3;4 Probable sulfate transporter 3.4 (AUR62016440)</p> <p>CNGC7 Putative cyclic nucleotide-gated ion channel 7 (AUR62004478)</p> <p>DTX14 Protein DETOXIFICATION 14 (AUR62002768)</p> <p>TMK1 Receptor protein kinase 1 (AUR62041961)</p> | <p>14 quinoas (6 sea-level, 4 altiplano, 2 valley, and 2 salares varieties) 5 <i>C. berlandieri</i> and 2 <i>C. hircinum</i> accessions</p> | <p>300 mM NaCl</p> | <p>[118]</p> |
|------------------------------------------------------------------------------------------------------------------------------------------------------------------------------------------------------------------------------------------------------------------------------------------------------------------------------------------------------------------------------------------------------------------------------------------------------------------------------------------------------------------------------------------------------------------------------------------------------------------------------------------------------------------------------------------------------------------------------------------------------------------------------------------------------------------------------------------------------------------------|---------------------------------------------------------------------------------------------------------------------------------------------|--------------------|--------------|
